# Supplementary material for: Genome‐wide analyses of Liberibacter species provides insights into evolution, phylogenetic relationships, and virulence factors
Source: PubMed Central journal article supplement (PMC7170780; doi:10.1111/mpp.12925), 2020-02-28
Supplement: MPP-21-716-s002.pdf [file MPP-21-716-s002.pdf]

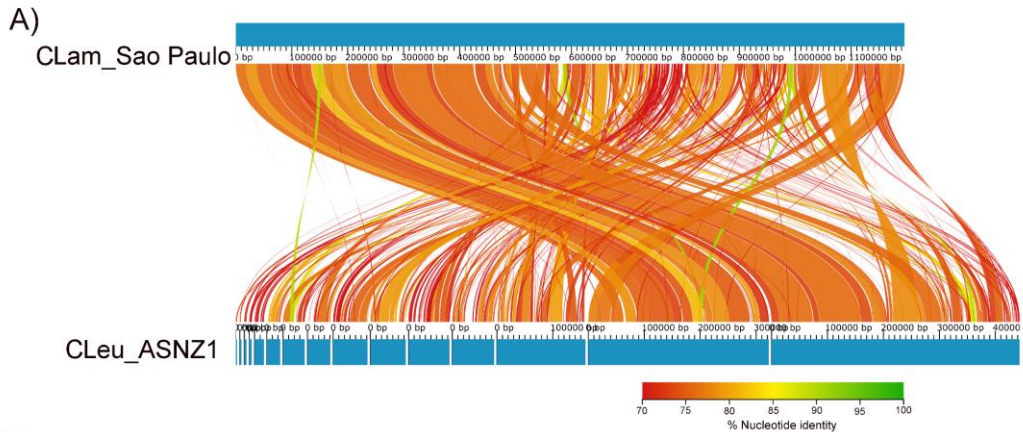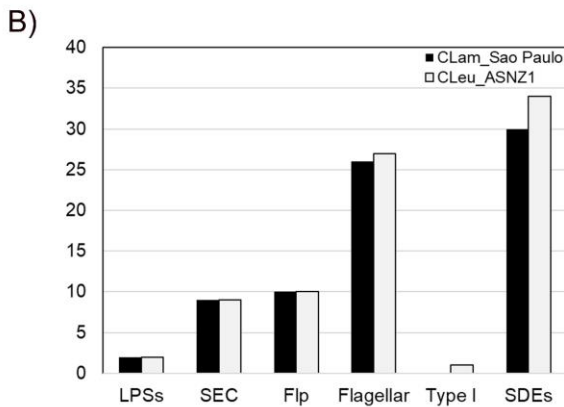

**Fig. S2 Genome-wide comparison of pathogenic Lam and nonpathogenic Leu.**  
**A).** Genome alignment of *C. Liberibacter americanus* (Lam, isolate Sao Paulo) and nonpathogenic *C. Liberibacter europaeus* (Leu, isolate ASNZ1). Linear chromosomal maps were built using AliTV visualization software, based on whole-genome alignments with Lastz aligner. Both panels depict pair-wise comparisons, expressed as percentage of nucleotide similarity, that connect different homologous genomic regions. Genomes are pictured in blue. Lam is a completely finished genome while Leu is not (note breaks in the blue genome depiction). **B).** The presence of different putative virulence genes in *C. Liberibacter* species. LPS = Lipopolysaccharide, SDE = Sec-dependent effectors, SEC = Sec Translocon, Type I = Type I secretion system.
