# Supplementary material for: Genome‐wide analyses of Liberibacter species provides insights into evolution, phylogenetic relationships, and virulence factors
Source: PubMed Central journal article supplement (PMC7170780; doi:10.1111/mpp.12925), 2020-02-28
Supplement: MPP-21-716-s003.pdf [file MPP-21-716-s003.pdf]

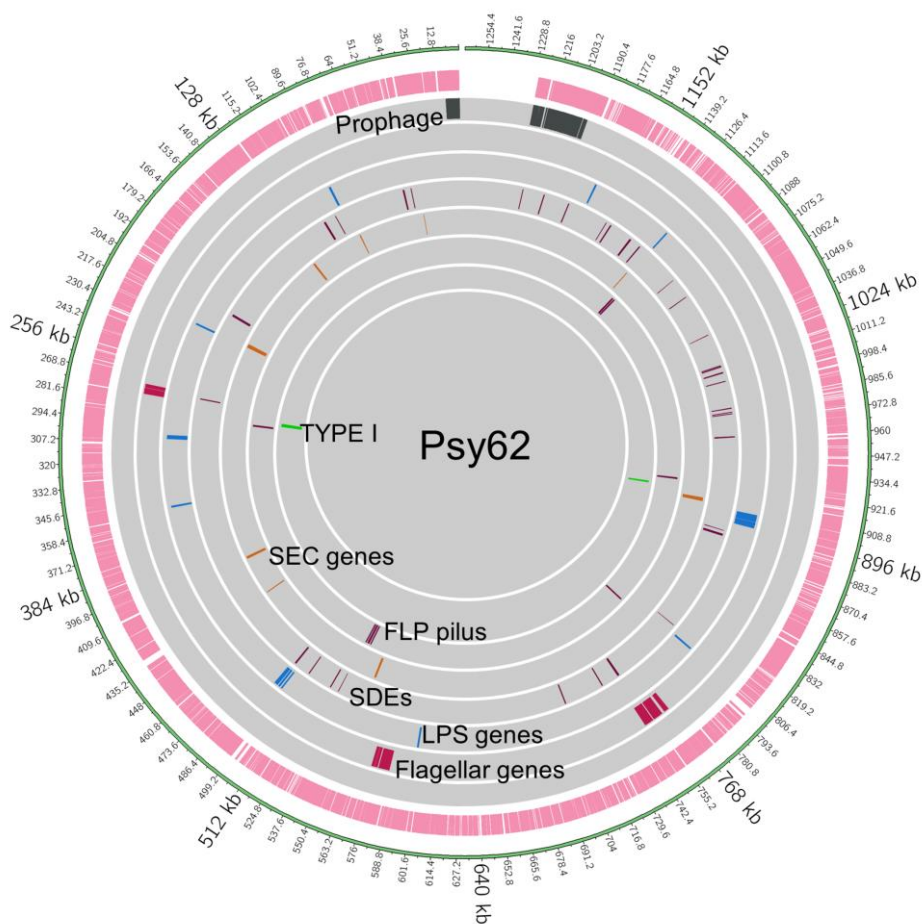

**Fig. S3 Distribution of prophage and potential virulent components in the Las Psy62 genome.** Circular plot depicting the genome-wide distribution of prophage and virulence components in Las Psy62. Other Las isolates harbor similar locations of the indicated genes. LPS = Lipopolysaccharide, SDE = Sec-dependent effectors, SEC = Sec translocon, Type I = Type I secretion system.
