# Supplementary material for: Genome‐wide analyses of Liberibacter species provides insights into evolution, phylogenetic relationships, and virulence factors
Source: PubMed Central journal article supplement (PMC7170780; doi:10.1111/mpp.12925), 2020-02-28
Supplement: MPP-21-716-s004.pdf [file MPP-21-716-s004.pdf]

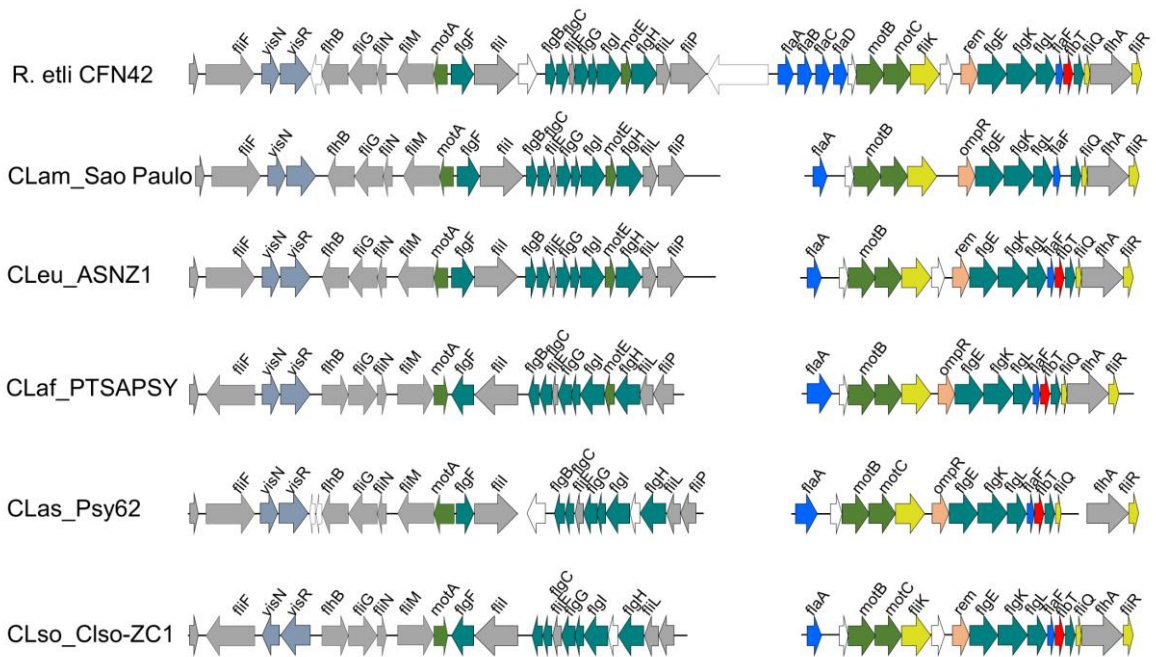

**Fig. S4 Comparison of the flagellar gene cluster present in *C. Liberibacter* species and *Rhizobium etli* isolate CFN42.** Genes are represented by arrows. Lam - strain Sao Paulo, Leu - strain ASNZ1, Laf - strain PTSAPSY, Las – strain Psy62, Lso - strain Clso-ZC1. Similar colors indicate similar genes. Continuous lines indicate presence in a single cluster.
